# Supplementary material for: Developmental and cartilaginous effects of protein-coated SiO2 nanoparticle corona complexes on zebrafish larvae
Source: Royal Society of Chemistry journal article supplement (doi:10.1039/c3ra45667f), 2014-01-01

*Supporting Information*

## **Developmental and Cartilaginous Effects of Protein-coated SiO<sub>2</sub> Nanoparticles Corona Complex in Zebrafish Larvae**

Ya-Ping Wang,<sup>a,b,¶</sup> Xiang Li,<sup>a,¶</sup> Ji-Yang Xue,<sup>a,b</sup> Yao-Shu Zhang,<sup>b,\*</sup> Xi-Zeng Feng<sup>a,b,\*</sup>

<sup>a</sup> State Key Laboratory of Medicinal Chemical Biology, College of Life Science, Nankai University, Tianjin 300071, China. Fax/Tel: +86 22 23507022, E-mail:

xzfeng@nankai.edu.cn

<sup>b</sup> Tianjin Key Laboratory on Technologies Enabling Development of Clinical Therapeutics and Diagnostics, School of Pharmacy, and Research Center of Pharmaceutical Sciences, Tianjin Medical University, Tianjin 300070, China. E-mail: zhangyaoshu@tjmu.edu.cn

¶ These authors contributed equally to this work.

\*Contact: Xi-Zeng Feng, Fax/Tel: +86 22 23507022, E-mail: xzfeng@nankai.edu.cn

Yao-Shu Zhang, E-mail: zhangyaoshu@tjmu.edu.cn

**Table S1. Experimental program for the toxicity assessments.**

| NP concentrations ( $\mu\text{g/ml}$ ) | Exposure period | Toxicological endpoints   | Results     |
|----------------------------------------|-----------------|---------------------------|-------------|
| 0, 100, 200, 300, 400, 500             | 4-72 hpf        | Hatch rate (48,54,72 hpf) | Figure. 1   |
| 0, 100, 200, 300, 400, 500             | 4-72 hpf        | Mortality (54,72,120 hpf) | Figure. 2   |
| 0, 100, 200, 300, 400, 500             | 4-72 hpf        | Malformations(96,120 hpf) | Figure. 3-5 |

**Figure S1. An comprehensive view of the developmental conditions following exposure at 96 and 120 hpf.**

| malformation         | 96hpf                                                                               |                                                                                     | 120hpf                                                                               |                                                                                       |
|----------------------|-------------------------------------------------------------------------------------|-------------------------------------------------------------------------------------|--------------------------------------------------------------------------------------|---------------------------------------------------------------------------------------|
|                      | 15nm                                                                                | 50nm                                                                                | 15nm                                                                                 | 50nm                                                                                  |
| Ctrl                 | 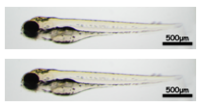 |  |  |  |
| 100 $\mu\text{g/mL}$ |  |  |  |  |
| 200 $\mu\text{g/mL}$ |  |  |  |  |
| 300 $\mu\text{g/mL}$ |  |  |  |  |
| 400 $\mu\text{g/mL}$ |  |  |  |  |
| 500 $\mu\text{g/mL}$ |  |  |  |  |
|                      | Dead                                                                                | Dead                                                                                | Dead                                                                                 | Dead                                                                                  |

**Figure S2. The proportion of each malformation type for different diameters at the same concentration.** The incidence of effects of different malformation types from exposure

to standard tank water (control) or 100, 200, 300, 400, or 500  $\mu\text{g}/\text{mL}$   $\text{SiO}_2$  NPs corona complex (in standard tank water).

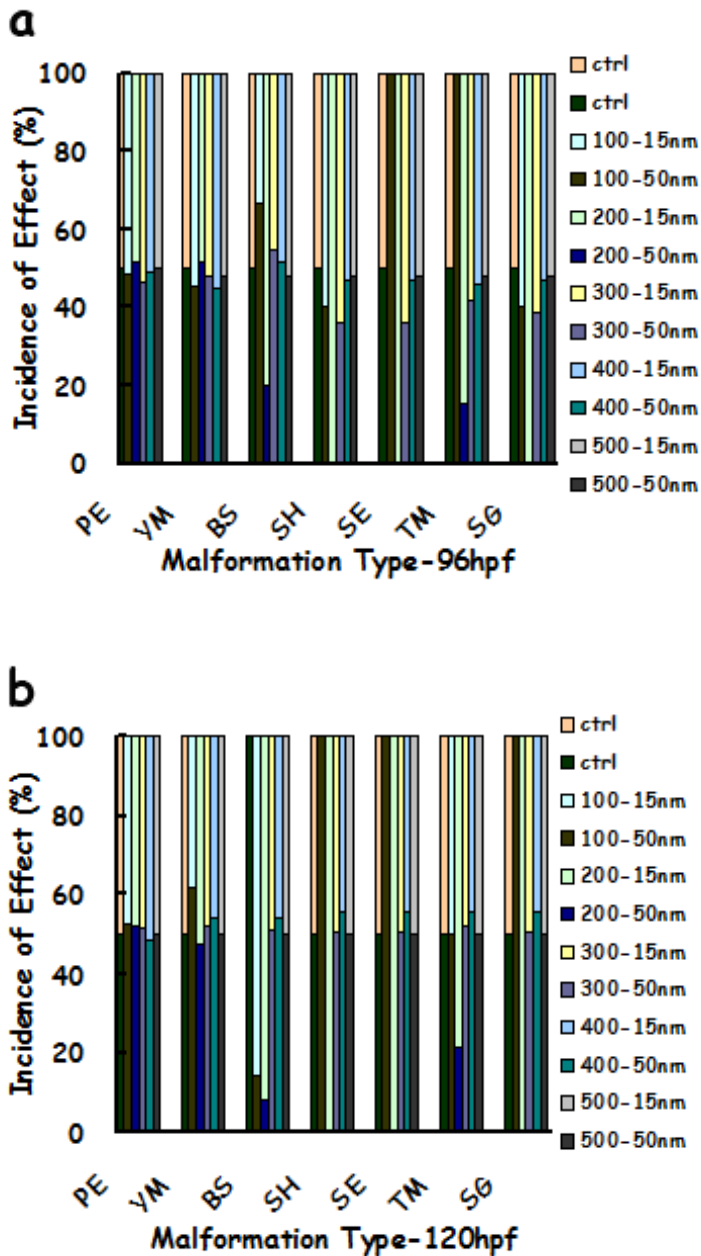

**Figure S3. A comprehensive overview of the cartilaginous toxicity for the vertebral column development.** Both 96 hpf and 120 hpf zebrafish exposed to different concentrations (200, 300 and 400  $\mu\text{g}/\text{mL}$ ) and different diameters (15 nm and 50 nm) of  $\text{SiO}_2$  NPs corona

complex.

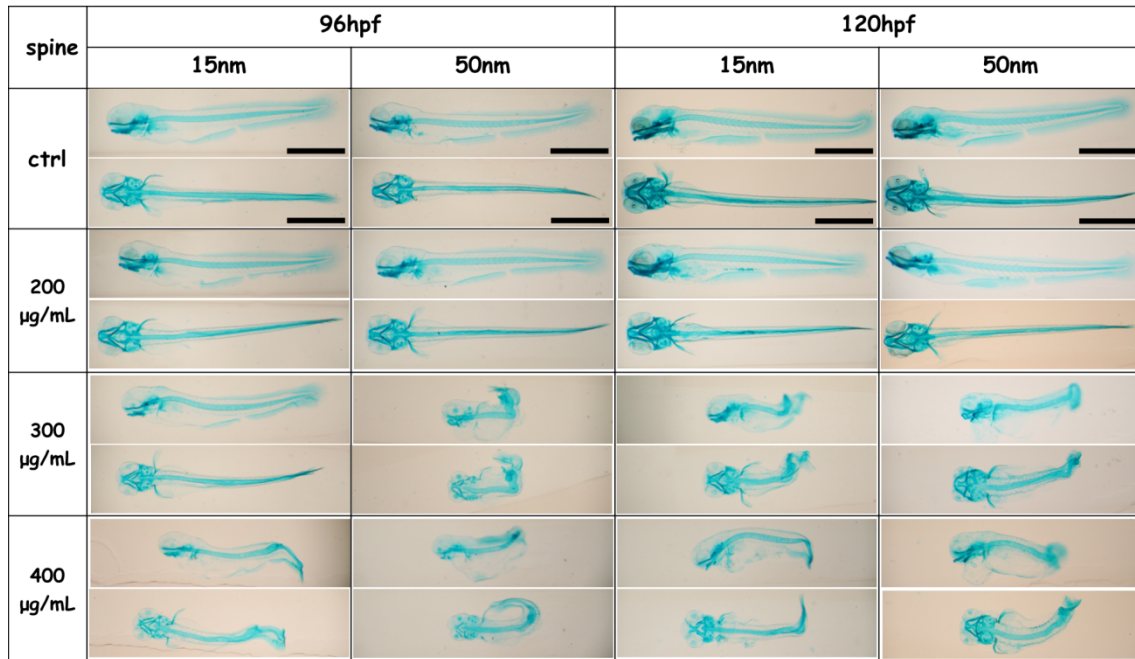

Supplement: c3ra45667f1.pdf [file c3ra45667f1.pdf]
